# Supplementary material
Source: PubMed Central journal article supplement (PMC1315366)
Supplement: plntcell_tpc.105.037945_2.pdf [file plntcell_tpc.105.037945_2.pdf]

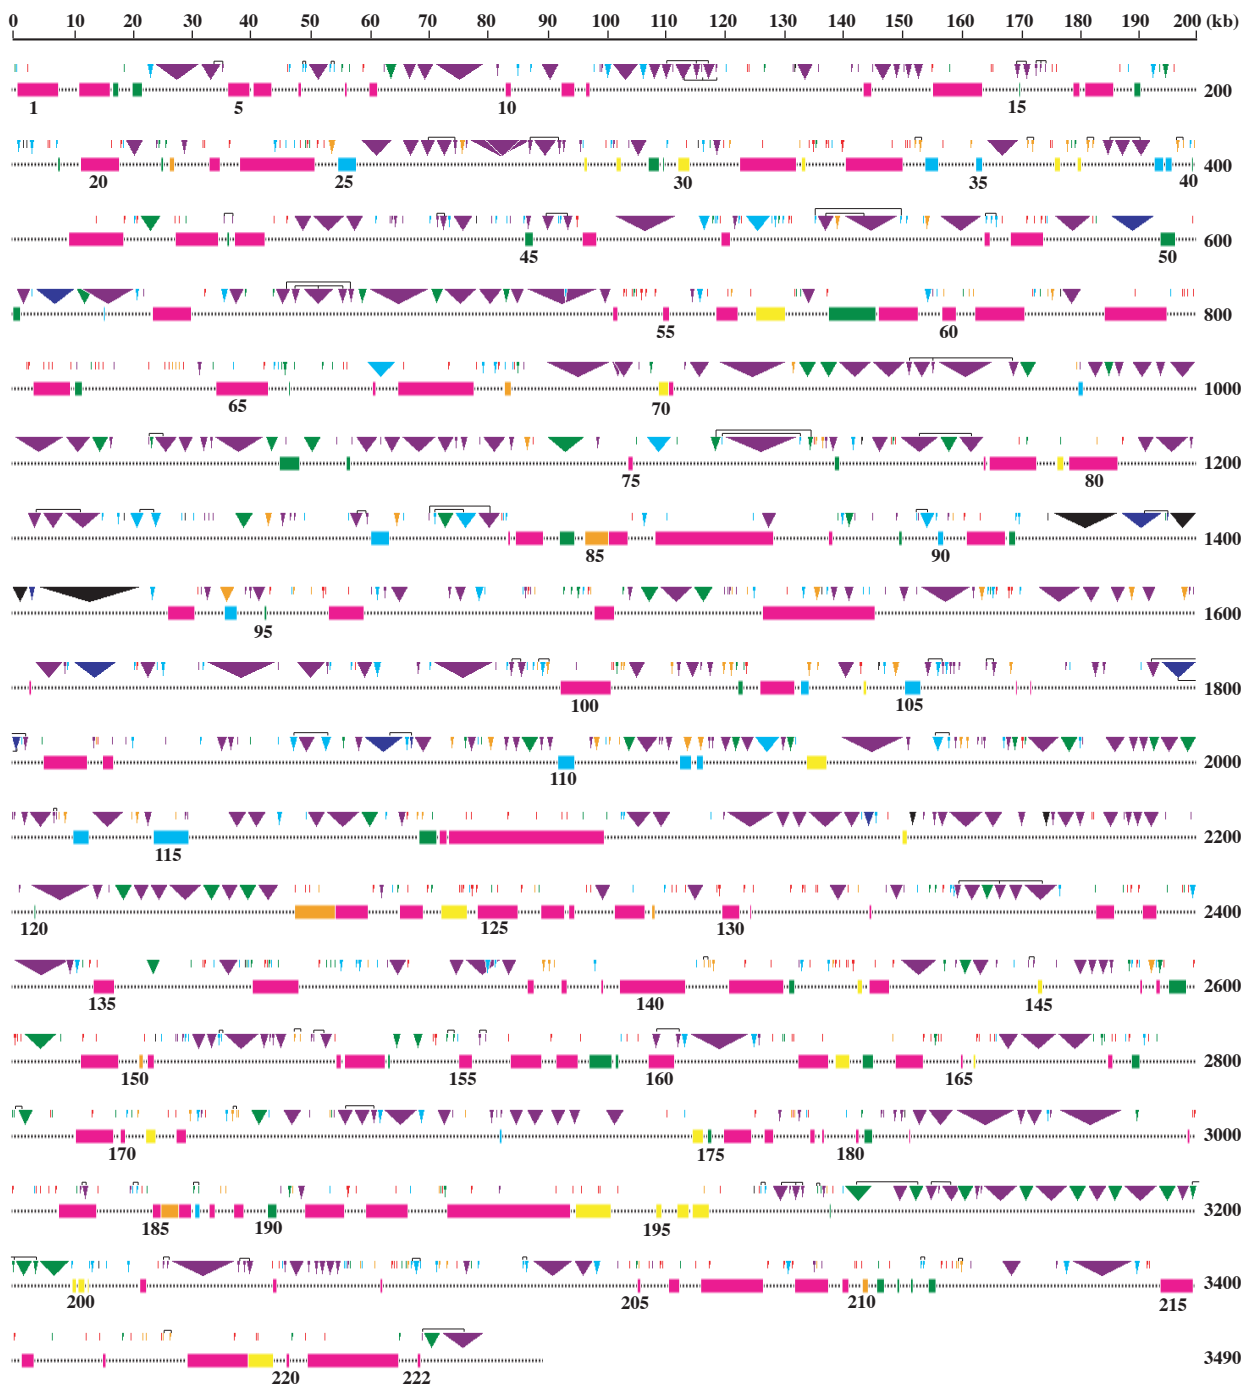

**Supplemental Figure 2.** Distribution of genes and repetitive elements within the ~ 3.5 Mb *Cen8* virtual contig. Locations of the 222 annotated genes are depicted as five different coloured boxes indicating the availability of transcriptional evidence. Solid line connects the same repetitive element that is interrupted by other DNA sequences.
