# Supplementary material
Source: PubMed Central journal article supplement (PMC1315366)
Supplement: plntcell_tpc.105.037945_6.pdf [file plntcell_tpc.105.037945_6.pdf]

**Supplemental Table 3. RT-PCR analysis of *Cen8* genes**

| Gene no | Gene name          | Gene description <sup>(a)</sup> | Primer pair | Genomic DNA PCR product (bp) | Predicted RT-PCR product (bp) <sup>(b)</sup> | Observed RT-PCR product (bp) <sup>(c)</sup> | Predicted vs. observed <sup>(d)</sup> | L | R | E | C | Combined       |
|---------|--------------------|---------------------------------|-------------|------------------------------|----------------------------------------------|---------------------------------------------|---------------------------------------|---|---|---|---|----------------|
| 1       | <i>Cen8.t00001</i> | A5 (B)                          | F1-R1       | 294                          | 294                                          | 294                                         | same                                  | + | + | + | + | +              |
| 2       | <i>Cen8.t00007</i> | A5 (B)                          | F1-R1       | 230                          | 230                                          | 230                                         | same                                  | + | + | + | + | +              |
| 3       | <i>Cen8.t00010</i> | C                               | F1-R1       | 250                          | 250                                          | na                                          |                                       | - | - | - | - | -              |
| 4       | <i>Cen8.t00012</i> | C                               | F1-R1       | 1454                         | 363                                          | na                                          |                                       | - | - | - | - | -              |
| 5       | <i>Cen8.t00021</i> | A5                              | F1-R1       | 209                          | 209                                          | 209                                         | same                                  | + | + | + | + | +              |
| 6       | <i>Cen8.t00023</i> | A5                              | F1-R1       | 193                          | 193                                          | 193                                         | same                                  | + | + | + | + | +              |
| 7       | <i>Cen8.t00027</i> | C                               | F1-R1       | 488                          | 241                                          | 488                                         | different                             | + | + | + | + | +              |
| 7       | <i>Cen8.t00027</i> | C                               | F1-R2       | 268                          | no                                           | 268                                         | different                             | + | + | + | + | +              |
| 8       | <i>Cen8.t00032</i> | B                               | F1-R1       | 272                          | 272                                          | 272                                         | same                                  | + | + | + | + | +              |
| 9       | <i>Cen8.t00034</i> | A5 (B)                          | F1-R1       | 281                          | 281                                          | 281                                         | same                                  | + | + | + | + | +              |
| na      | <i>Cen8.t00037</i> | C                               | F1-R1       | 126                          | 126                                          | 80                                          | different                             | + | + | + | + | - (Non-coding) |
| 10      | <i>Cen8.t00047</i> | C                               | F1-R1       | 798                          | 192                                          | 192                                         | same                                  | + | + | + | + | +              |
| 11      | <i>Cen8.t00052</i> | A5                              | F1-R1       | 264                          | 264                                          | 264                                         | same                                  | + | + | + | + | +              |
| 12      | <i>Cen8.t00054</i> | C                               | F1-R1       | 614                          | 192                                          | 614                                         | different                             | - | - | + | - | +              |
| 13      | <i>Cen8.t00080</i> | C                               | F3-R3       | 219                          | 219                                          | 219                                         | same                                  | + | + | + | + | +              |
| 14      | <i>Cen8.t00087</i> | A5 (B)                          | F1-R1       | 251                          | 251                                          | 251                                         | same                                  | + | + | + | + | +              |
| 15      | <i>Cen8.t00095</i> | C                               | F1-R1       | 224                          | 224                                          | na                                          |                                       | - | - | - | - | -              |
| 16      | <i>Cen8.t00100</i> | A5                              | F1-R1       | 198                          | 198                                          | 198                                         | same                                  | + | + | + | + | +              |
| 17      | <i>Cen8.t00101</i> | A5 (B)                          | F1-R1       | 273                          | 273                                          | 273                                         | same                                  | + | + | + | + | +              |
| 18      | <i>Cen8.t00106</i> | C                               | F1-R1       | 1070                         | 186                                          | na                                          |                                       | - | - | - | - | -              |
| 19      | <i>Cen8.t00116</i> | C                               | F1-R1       | 176                          | 176                                          | na                                          |                                       | - | - | - | - | -              |
| 20      | <i>Cen8.t00118</i> | A5 (B)                          | F1-R1       | 298                          | 212                                          | 212                                         | same                                  | + | + | + | + | +              |
| 21      | <i>Cen8.t00125</i> | B                               | F1-R1       | 253                          | 253                                          | na                                          |                                       | - | - | - | - | -              |
| 23      | <i>Cen8.t00130</i> | A1                              | F1-R1       | 392                          | 392                                          | 392                                         | same                                  | + | + | + | + | +              |
| 24      | <i>Cen8.t00133</i> | A5 (B)                          | F1-R1       | 244                          | 244                                          | 244                                         | same                                  | - | + | + | + | +              |
| 26      | <i>Cen8.t00165</i> | A1                              | F1-R1       | 283                          | 283                                          | 283                                         | same                                  | - | + | - | - | +              |
| 27      | <i>Cen8.t00168</i> | A1                              | F1-R1       | 267                          | 267                                          | 267                                         | same                                  | - | + | - | - | +              |

|    |                    |        |       |      |     |     |           |   |   |   |   |   |
|----|--------------------|--------|-------|------|-----|-----|-----------|---|---|---|---|---|
| 28 | <i>Cen8.t00171</i> | C      | F1-R1 | 376  | 335 | na  |           | - | - | - | - | - |
| 29 | <i>Cen8.t00173</i> | C      | F1-R1 | 207  | 207 | na  |           | - | - | - | - | - |
| 30 | <i>Cen8.t00174</i> | C      | F1-R1 | 1397 | 888 | 780 | different | - | + | - | + | + |
| 31 | <i>Cen8.t00180</i> | A4 (B) | F1-R1 | 983  | nd  | 260 |           | + | + | + | + | + |
| 32 | <i>Cen8.t00186</i> | C      | F1-R1 | 555  | no  | 500 | different | + | - | - | - | + |
| 32 | <i>Cen8.t00186</i> | C      | F2-R1 | 207  | 207 | 207 | same      | + | - | - | - | + |
| 33 | <i>Cen8.t00190</i> | A5 (B) | F1-R1 | 272  | 198 | 198 | same      | + | + | + | + | + |
| 36 | <i>Cen8.t00209</i> | C      | F1-R1 | 967  | 130 | 967 | different | + | - | - | - | + |
| 37 | <i>Cen8.t00212</i> | C      | F1-R1 | 291  | 291 | 200 | different | + | + | - | - | + |
| 40 | <i>Cen8.t00222</i> | C      | F1-R1 | 193  | 193 | na  |           | - | - | - | - | - |
| 41 | <i>Cen8.t00228</i> | A5 (B) | F1-R1 | 212  | 212 | 212 | same      | + | + | + | + | + |
| 42 | <i>Cen8.t00238</i> | A5 (B) | F1-R1 | 291  | 291 | 291 | same      | + | + | + | + | + |
| 43 | <i>Cen8.t00243</i> | C      | F1-R1 | 261  | 261 | na  |           | - | - | - | - | - |
| 44 | <i>Cen8.t00244</i> | A5 (B) | F1-R1 | 262  | 262 | 262 | same      | + | + | + | + | + |
| 45 | <i>Cen8.t00271</i> | C      | F2-R2 | 519  | 239 | na  |           | - | - | - | - | - |
| 46 | <i>Cen8.t00276</i> | A5     | F1-R1 | 194  | 194 | 194 | same      | + | + | + | + | + |
| 47 | <i>Cen8.t00289</i> | A5 (B) | F1-R1 | 302  | 302 | 302 | same      | + | + | + | + | + |
| 48 | <i>Cen8.t00314</i> | B      | F1-R1 | 211  | 211 | 211 | same      | + | + | + | + | + |
| 49 | <i>Cen8.t00316</i> | B      | F1-R1 | 840  | 479 | 479 | same      | + | + | + | + | + |
| 50 | <i>Cen8.t00330</i> | C      | F1-R1 | 869  | 289 | na  |           | - | - | - | - | - |
| 51 | <i>Cen8.t00334</i> | C      | F1-R1 | 979  | 244 | na  |           | - | - | - | - | - |
| 53 | <i>Cen8.t00347</i> | A5 (B) | F1-R1 | 262  | 160 | 160 | same      | + | + | + | + | + |
| 54 | <i>Cen8.t00390</i> | A5     | F1-R1 | 283  | 283 | 283 | same      | + | + | + | + | + |
| 55 | <i>Cen8.t00395</i> | A5     | F1-R1 | 264  | 264 | 264 | same      | + | + | + | + | + |
| 56 | <i>Cen8.t00400</i> | A5 (B) | F1-R1 | 289  | 178 | 178 | same      | + | + | + | + | + |
| 57 | <i>Cen8.t00404</i> | A5 (B) | F1-R1 | 228  | 228 | 228 | same      | + | - | - | + | + |
| 58 | <i>Cen8.t00411</i> | C      | F1-R1 | 880  | 506 | na  |           | - | - | - | - | - |
| 59 | <i>Cen8.t00415</i> | B      | F1-R1 | 431  | 431 | 431 | same      | + | + | + | + | + |
| 60 | <i>Cen8.t00421</i> | C      | F1-R1 | 471  | 442 | 442 | same      | + | + | + | + | + |
| 61 | <i>Cen8.t00424</i> | A4 (B) | F1-R1 | 289  | nd  | 289 |           | + | + | + | + | + |
| 62 | <i>Cen8.t00436</i> | A5 (B) | F1-R1 | 264  | 264 | 264 | same      | + | + | + | + | + |

|    |                    |        |       |     |     |          |           |      |      |      |      |   |
|----|--------------------|--------|-------|-----|-----|----------|-----------|------|------|------|------|---|
| 63 | <i>Cen8.t00447</i> | A5 (B) | F1-R1 | 268 | 268 | 268      | same      | +    | +    | +    | +    | + |
| 64 | <i>Cen8.t00451</i> | B      | F1-R1 | 179 | 179 | na       |           | -    | -    | -    | -    | - |
| 65 | <i>Cen8.t00464</i> | A5 (B) | F1-R1 | 274 | 274 | 274      | same      | +    | +    | +    | +    | + |
| 66 | <i>Cen8.t00471</i> | C      | F1-R1 | 350 | 166 | na       |           | -    | -    | -    | -    | - |
| 67 | <i>Cen8.t00479</i> | C      | F1-R1 | 411 | 156 | 411, 320 | different | +, + | +, + | +, - | +, - | + |
| 68 | <i>Cen8.t00481</i> | A5 (B) | F1-R1 | 263 | 263 | 263      | same      | +    | +    | +    | +    | + |
| 70 | <i>Cen8.t00506</i> | A5 (B) | F1-R1 | 282 | 282 | 282      | same      | +    | +    | -    | +    | + |
| 71 | <i>Cen8.t00507</i> | A1     | F1-R1 | 249 | 249 | 249      | same      | +    | +    | +    | +    | + |
| 73 | <i>Cen8.t00581</i> | B      | F1-R1 | 300 | 300 | na       |           | -    | -    | -    | -    | - |
| 74 | <i>Cen8.t00587</i> | B      | F1-R1 | 515 | 286 | na       |           | -    | -    | -    | -    | - |
| 75 | <i>Cen8.t00614</i> | C      | F3-R3 | 240 | 240 | 240      | same      | -    | +    | +    | -    | + |
| 76 | <i>Cen8.t00633</i> | C      | F1-R1 | 166 | 166 | na       |           | -    | -    | -    | -    | - |
| 77 | <i>Cen8.t00647</i> | C      | F1-R1 | 190 | 190 | 190      | same      | +    | +    | +    | +    | + |
| 78 | <i>Cen8.t00648</i> | A5 (B) | F1-R1 | 279 | 279 | 279      | same      | +    | +    | +    | +    | + |
| 79 | <i>Cen8.t00654</i> | C      | F1-R1 | 892 | 397 | 450, 150 | different | -, - | +, + | -, - | +, + | + |
| 80 | <i>Cen8.t00655</i> | A5 (B) | F1-R1 | 242 | 242 | 242      | same      | +    | +    | +    | +    | + |
| 82 | <i>Cen8.t00714</i> | C      | F1-R1 | 295 | 295 | 240      | different | +    | -    | +    | -    | + |
| 83 | <i>Cen8.t00715</i> | A5     | F1-R1 | 223 | 223 | 223      | same      | +    | +    | +    | +    | + |
| 84 | <i>Cen8.t00719</i> | C      | F1-R1 | 221 | 221 | na       |           | -    | -    | -    | -    | - |
| 86 | <i>Cen8.t00724</i> | A5 (B) | F1-R1 | 219 | 219 | 219      | same      | +    | +    | +    | +    | + |
| 87 | <i>Cen8.t00728</i> | A5 (B) | F1-R1 | 285 | 197 | 197      | same      | +    | +    | +    | +    | + |
| 88 | <i>Cen8.t00744</i> | B      | F1-R1 | 558 | 151 | 151      | same      | +    | +    | +    | +    | + |
| na | <i>Cen8.t00749</i> | A2     | F1-R1 | 172 | 172 | na       |           | -    | -    | -    | -    | - |
| 89 | <i>Cen8.t00750</i> | C      | F1-R1 | 257 | 257 | na       |           | -    | -    | -    | -    | - |
| 91 | <i>Cen8.t00757</i> | A5 (B) | F1-R1 | 284 | 284 | 284      | same      | +    | +    | +    | +    | + |
| 92 | <i>Cen8.t00761</i> | B      | F1-R1 | 725 | 394 | na       |           | -    | -    | -    | -    | - |
| 93 | <i>Cen8.t00793</i> | A5 (B) | F1-R1 | 191 | 191 | 191      | same      | +    | +    | +    | +    | + |
| 95 | <i>Cen8.t00802</i> | C      | F1-R1 | 306 | 175 | na       |           | -    | -    | -    | -    | - |
| 96 | <i>Cen8.t00808</i> | A3 (B) | F1-R1 | 272 | 272 | 272      | same      | +    | +    | +    | +    | + |
| 97 | <i>Cen8.t00833</i> | A5 (B) | F1-R1 | 245 | 245 | 245      | same      | +    | +    | +    | +    | + |
| 98 | <i>Cen8.t00849</i> | A5     | F3-R3 | 243 | 243 | 243      | same      | +    | +    | +    | +    | + |

|     |                    |        |       |      |     |     |           |   |   |   |   |                |
|-----|--------------------|--------|-------|------|-----|-----|-----------|---|---|---|---|----------------|
| 99  | <i>Cen8.t00891</i> | C      | F1-R1 | 225  | 187 | 225 | different | + | + | + | + | +              |
| 100 | <i>Cen8.t00941</i> | A5 (B) | F1-R1 | 198  | 123 | 123 | same      | + | + | + | + | +              |
| na  | <i>Cen8.t00948</i> | C      | F1-R1 | 181  | 181 | 90  | different | + | + | - | - | - (Non-coding) |
| 101 | <i>Cen8.t00958</i> | C      | F2-R2 | 227  | 227 | na  |           | - | - | - | - | -              |
| 102 | <i>Cen8.t00960</i> | C      | F1-R1 | 531  | 317 | 317 | same      | + | + | + | + | +              |
| 104 | <i>Cen8.t00969</i> | C      | F2-R1 | 271  | 271 | 271 | same      | - | - | - | + | +              |
| 106 | <i>Cen8.t00984</i> | A2     | F1-R1 | 265  | 265 | 265 | same      | - | + | + | + | +              |
| 107 | <i>Cen8.t00985</i> | C      | F1-R1 | 203  | 203 | 203 | same      | + | - | + | - | +              |
| 108 | <i>Cen8.t01003</i> | A5 (B) | F1-R1 | 296  | 296 | 296 | same      | + | + | + | + | +              |
| 109 | <i>Cen8.t01009</i> | A5     | F1-R1 | 206  | 206 | 206 | same      | + | + | + | + | +              |
| 113 | <i>Cen8.t01075</i> | A3     | F1-R1 | 301  | 215 | 215 | same      | - | + | - | + | +              |
| 116 | <i>Cen8.t01150</i> | C      | F2-R2 | 218  | 218 | na  |           | - | - | - | - | -              |
| 117 | <i>Cen8.t01152</i> | A5     | F1-R1 | 288  | 288 | 288 | same      | + | + | + | + | +              |
| 118 | <i>Cen8.t01153</i> | A5 (B) | F1-R1 | 226  | 226 | 226 | same      | + | + | + | + | +              |
| 119 | <i>Cen8.t01195</i> | B      | F1-R1 | 274  | 274 | 274 | same      | + | + | - | + | +              |
| 120 | <i>Cen8.t01225</i> | C      | F1-R1 | 148  | 148 | na  |           | - | - | - | - | -              |
| 122 | <i>Cen8.t01253</i> | A5 (B) | F1-R1 | 179  | 179 | 179 | same      | + | + | + | + | +              |
| 123 | <i>Cen8.t01259</i> | A5 (B) | F1-R1 | 281  | 281 | 281 | same      | + | + | + | + | +              |
| 124 | <i>Cen8.t01263</i> | A5 (B) | F1-R1 | 297  | 297 | 297 | same      | - | - | - | + | +              |
| 125 | <i>Cen8.t01266</i> | A5     | F1-R1 | 295  | 218 | 218 | same      | + | + | + | + | +              |
| 126 | <i>Cen8.t01272</i> | A5 (B) | F1-R1 | 261  | 181 | 181 | same      | + | + | + | + | +              |
| 127 | <i>Cen8.t01275</i> | A1     | F1-R1 | 194  | 194 | 194 | same      | + | + | + | + | +              |
| 128 | <i>Cen8.t01279</i> | C      | F1-R2 | 3394 | 560 | 770 | different | + | + | + | + | +              |
| 128 | <i>Cen8.t01279</i> | C      | F1-R1 | 237  | 237 | 237 | same      | + | + | + | + | +              |
| 130 | <i>Cen8.t01289</i> | A5 (B) | F1-R1 | 226  | 226 | 226 | same      | + | + | + | + | +              |
| 131 | <i>Cen8.t01292</i> | C      | F1-R1 | 162  | 162 | 162 | same      | - | - | + | + | +              |
| 132 | <i>Cen8.t01303</i> | A2     | F1-R1 | 288  | 288 | 288 | same      | + | + | + | + | +              |
| 133 | <i>Cen8.t01324</i> | A1 (B) | F1-R1 | 282  | 282 | 282 | same      | + | + | + | + | +              |
| 134 | <i>Cen8.t01329</i> | B      | F1-R1 | 301  | 301 | 301 | same      | + | + | + | + | +              |
| 135 | <i>Cen8.t01341</i> | A5 (B) | F1-R1 | 243  | 243 | 243 | same      | + | + | + | - | +              |
| 136 | <i>Cen8.t01356</i> | A5 (B) | F1-R1 | 294  | 204 | 204 | same      | + | + | + | + | +              |

|     |                    |        |       |      |     |          |           |      |      |      |      |   |
|-----|--------------------|--------|-------|------|-----|----------|-----------|------|------|------|------|---|
| 137 | <i>Cen8.t01382</i> | C      | F1-R1 | 564  | 225 | 564      | different | +    | +    | +    | +    | + |
| 138 | <i>Cen8.t01385</i> | A5 (B) | F1-R1 | 258  | 258 | 258      | same      | +    | +    | +    | +    | + |
| 139 | <i>Cen8.t01389</i> | B      | F1-R1 | 228  | 228 | 228, 170 | same      | -, + | -, + | +, + | +, + | + |
| 140 | <i>Cen8.t01391</i> | A5 (B) | F1-R1 | 218  | 218 | 218      | same      | +    | +    | +    | +    | + |
| 141 | <i>Cen8.t01401</i> | A4 (B) | F1-R1 | 1526 | nd  | 420      |           | +    | +    | +    | +    | + |
| 142 | <i>Cen8.t01407</i> | C      | F1-R1 | 462  | 293 | na       |           | -    | -    | -    | -    | - |
| 143 | <i>Cen8.t01413</i> | A1 (B) | F2-R2 | 273  | 273 | 273      | same      | +    | -    | -    | +    | + |
| 144 | <i>Cen8.t01415</i> | A5 (B) | F1-R1 | 289  | 289 | 289      | same      | +    | +    | +    | +    | + |
| 145 | <i>Cen8.t01430</i> | C      | F1-R1 | 297  | 297 | 297      | same      | -    | -    | -    | +    | + |
| 146 | <i>Cen8.t01440</i> | C      | F1-R1 | 244  | 244 | 244      | same      | -    | +    | +    | +    | + |
| 147 | <i>Cen8.t01441</i> | C      | F1-R1 | 434  | 153 | 434      | different | -    | -    | +    | -    | + |
| 148 | <i>Cen8.t01442</i> | B      | F1-R1 | 271  | 271 | na       |           | -    | -    | -    | -    | - |
| 149 | <i>Cen8.t01451</i> | B      | F1-R1 | 2596 | 254 | 850, 254 | same      | -, - | +, + | +, + | +, - | + |
| 151 | <i>Cen8.t01458</i> | C      | F1-R1 | 247  | 247 | 247      | same      | -    | +    | +    | +    | + |
| 152 | <i>Cen8.t01475</i> | A1     | F2-R2 | 160  | 160 | 160      | same      | +    | +    | +    | +    | + |
| 153 | <i>Cen8.t01476</i> | A5 (B) | F1-R1 | 273  | 273 | 273      | same      | +    | +    | +    | +    | + |
| 154 | <i>Cen8.t01480</i> | C      | F1-R1 | 280  | 280 | na       |           | -    | -    | -    | -    | - |
| 155 | <i>Cen8.t01487</i> | A5 (B) | F1-R1 | 276  | 162 | 162      | same      | +    | +    | +    | +    | + |
| 156 | <i>Cen8.t01492</i> | A5 (B) | F1-R1 | 262  | 262 | 262      | same      | +    | +    | +    | +    | + |
| 157 | <i>Cen8.t01496</i> | A5 (B) | F1-R1 | 210  | 210 | 210      | same      | +    | +    | +    | +    | + |
| 158 | <i>Cen8.t01499</i> | B      | F1-R1 | 760  | 526 | na       |           | -    | -    | -    | -    | - |
| 159 | <i>Cen8.t01502</i> | C      | F1-R1 | 386  | 334 | na       |           | -    | -    | -    | -    | - |
| 159 | <i>Cen8.t01502</i> | C      | F2-R1 | 270  | 270 | na       |           | -    | -    | -    | -    | - |
| 160 | <i>Cen8.t01504</i> | A5     | F1-R1 | 235  | 235 | 235      | same      | +    | +    | +    | +    | + |
| 161 | <i>Cen8.t01519</i> | A5 (B) | F1-R1 | 294  | 294 | 294      | same      | +    | +    | +    | +    | + |
| 162 | <i>Cen8.t01522</i> | A5 (B) | F1-R1 | 301  | 301 | 301      | same      | -    | -    | -    | +    | + |
| 163 | <i>Cen8.t01525</i> | C      | F2-R2 | 237  | 237 | na       |           | -    | -    | -    | -    | - |
| 164 | <i>Cen8.t01528</i> | A5 (B) | F1-R1 | 290  | 184 | 184      | same      | +    | +    | +    | +    | + |
| 165 | <i>Cen8.t01534</i> | C      | F2-R2 | 286  | 286 | 286      | same      | +    | +    | +    | +    | + |
| 166 | <i>Cen8.t01535</i> | C      | F2-R1 | 174  | 174 | 174      | same      | +    | +    | -    | +    | + |
| 167 | <i>Cen8.t01548</i> | A5     | F1-R1 | 260  | 260 | 260      | same      | +    | +    | +    | +    | + |

|     |                    |        |       |             |     |          |           |      |      |      |      |   |
|-----|--------------------|--------|-------|-------------|-----|----------|-----------|------|------|------|------|---|
| 168 | <i>Cen8.t01550</i> | C      | F2-R2 | 605         | 605 | na       |           | -    | -    | -    | -    | - |
| 169 | <i>Cen8.t01562</i> | A5 (B) | F1-R1 | 229         | 229 | 229      | same      | +    | +    | +    | +    | + |
| 170 | <i>Cen8.t01566</i> | C      | F1-R1 | 586         | 564 | 564      | same      | +    | -    | +    | -    | + |
| 170 | <i>Cen8.t01566</i> | C      | F2-R1 | 246         | 246 | 246      | same      | +    | -    | +    | -    | + |
| 171 | <i>Cen8.t01569</i> | C      | F1-R1 | 742         | 543 | 742      | different | -    | -    | -    | +    | + |
| 172 | <i>Cen8.t01571</i> | C      | F1-R1 | 531         | 531 | 531      | same      | +    | -    | +    | +    | + |
| 174 | <i>Cen8.t01619</i> | C      | F1-R1 | 356         | 356 | 356      | same      | +    | -    | -    | +    | + |
| 175 | <i>Cen8.t01620</i> | C      | F1-R1 | 174         | 174 | na       |           | -    | -    | -    | -    | - |
| 176 | <i>Cen8.t01623</i> | A4     | F2-R2 | 538         | nd  | 538      |           | +    | +    | +    | +    | + |
| 177 | <i>Cen8.t01626</i> | C      | F1-R1 | 501         | 501 | 501      | same      | +    | -    | +    | -    | + |
| 178 | <i>Cen8.t01630</i> | A1     | F1-R1 | 274         | 274 | 274      | same      | +    | +    | +    | +    | + |
| 179 | <i>Cen8.t01631</i> | A5     | F1-R1 | 299         | 299 | 299      | same      | +    | +    | +    | +    | + |
| 180 | <i>Cen8.t01634</i> | A5     | F1-R1 | 199         | 199 | 199      | same      | +    | +    | +    | +    | + |
| 181 | <i>Cen8.t01635</i> | B      | F1-R1 | 172         | 172 | na       |           | -    | -    | -    | -    | - |
| 182 | <i>Cen8.t01639</i> | A2     | F1-R1 | 257         | 257 | 257      | same      | +    | +    | +    | +    | + |
| 183 | <i>Cen8.t01665</i> | C      | F1-R1 | 269         | 139 | 139      | same      | +    | +    | +    | +    | + |
| 184 | <i>Cen8.t01670</i> | A5 (B) | F1-R1 | 276         | 276 | 276      | same      | +    | +    | +    | +    | + |
| 185 | <i>Cen8.t01679</i> | A5     | F1-R1 | 299         | 299 | 299      | same      | +    | +    | +    | +    | + |
| 188 | <i>Cen8.t01684</i> | C      | F1-R1 | 233         | 233 | 233      | same      | +    | -    | +    | -    | + |
| 189 | <i>Cen8.t01686</i> | A4     | F2-R2 | 438         | nd  | 438      |           | +    | +    | +    | +    | + |
| 190 | <i>Cen8.t01689</i> | C      | F1-R1 | 515         | 515 | na       |           | -    | -    | -    | -    | - |
| 191 | <i>Cen8.t01695</i> | A1 (B) | F1-R1 | 264         | 264 | 264      | same      | +    | +    | +    | +    | + |
| 192 | <i>Cen8.t01699</i> | A5     | F1-R1 | 299         | 299 | 299      | same      | +    | +    | +    | +    | + |
| 193 | <i>Cen8.t01706</i> | A4 (B) | F1-R1 | na (11,680) | nd  | 1200     |           | +    | +    | +    | +    | + |
| 193 | <i>Cen8.t01706</i> | A4 (B) | F2-R2 | 1934        | nd  | 1100     |           | +    | +    | +    | +    | + |
| 194 | <i>Cen8.t01718</i> | A5     | F1-R1 | 251         | 251 | 251      | same      | -    | +    | -    | -    | + |
| 195 | <i>Cen8.t01726</i> | A3 (B) | F1-R1 | 916, 250    | 597 | 597      | same      | -    | -    | -    | +    | + |
| 196 | <i>Cen8.t01728</i> | C      | F1-R2 | 471         | 380 | 471      | different | +    | -    | -    | +    | + |
| 197 | <i>Cen8.t01729</i> | C      | F1-R1 | 770         | 413 | 770, 413 | same      | +, - | +, - | -, - | -, + | + |
| 198 | <i>Cen8.t01742</i> | C      | F1-R1 | 166         | 166 | na       |           | -    | -    | -    | -    | - |
| 199 | <i>Cen8.t01782</i> | C      | F1-R1 | 583         | 202 | 202      | same      | -    | -    | -    | +    | + |

|     |                    |        |       |      |     |               |           |         |         |         |         |   |
|-----|--------------------|--------|-------|------|-----|---------------|-----------|---------|---------|---------|---------|---|
| 200 | <i>Cen8.t01783</i> | C      | F1-R2 | 348  | no  | 348           | different | -       | -       | -       | +       | + |
| 200 | <i>Cen8.t01783</i> | C      | F1-R1 | 193  | 193 | 193           | same      | -       | -       | -       | +       | + |
| 201 | <i>Cen8.t01784</i> | B      | F1-R1 | 268  | 268 | 268           | same      | -       | -       | -       | +       | + |
| 202 | <i>Cen8.t01789</i> | A1 (B) | F1-R1 | 428  | 428 | 428           | same      | +       | +       | +       | +       | + |
| 203 | <i>Cen8.t01801</i> | A3 (B) | F1-R1 | 776  | 776 | 776           | same      | -       | +       | +       | -       | + |
| 204 | <i>Cen8.t01811</i> | C      | F2-R2 | 261  | 261 | 261           | same      | +       | +       | +       | +       | + |
| 205 | <i>Cen8.t01835</i> | C      | F1-R1 | 179  | 179 | 179, 90       | same      | -, +    | -, +    | -, +    | +, +    | + |
| 206 | <i>Cen8.t01838</i> | A1 (B) | F1-R1 | 265  | 265 | 265           | same      | +       | +       | +       | +       | + |
| 207 | <i>Cen8.t01841</i> | A5 (B) | F1-R1 | 221  | 147 | 147           | same      | +       | +       | +       | +       | + |
| 208 | <i>Cen8.t01850</i> | A5     | F1-R1 | 277  | 277 | 277           | same      | +       | +       | +       | +       | + |
| 209 | <i>Cen8.t01854</i> | B      | F1-R1 | 229  | 229 | 229           | same      | +       | +       | +       | +       | + |
| 211 | <i>Cen8.t01858</i> | C      | F1-R1 | 535  | 197 | na            |           | -       | -       | -       | -       | - |
| 212 | <i>Cen8.t01860</i> | C      | F1-R1 | 150  | 150 | na            |           | -       | -       | -       | -       | - |
| 213 | <i>Cen8.t01861</i> | C      | F1-R1 | 229  | 229 | na            |           | -       | -       | -       | -       | - |
| 214 | <i>Cen8.t01863</i> | C      | F1-R1 | 260  | 260 | na            |           | -       | -       | -       | -       | - |
| 215 | <i>Cen8.t01884</i> | B      | F1-R1 | 488  | 399 | 399           | same      | +       | +       | +       | +       | + |
| 216 | <i>Cen8.t01889</i> | C      | F1-R2 | 558  | 258 | 558, 380      | different | +, +    | +, +    | +, +    | -, +    | + |
| 216 | <i>Cen8.t01889</i> | C      | F1-R1 | 194  | 194 | 194           | same      | +       | +       | +       | +       | + |
| 217 | <i>Cen8.t01896</i> | B      | F1-R1 | 254  | 254 | 254           | same      | -       | -       | +       | -       | + |
| 218 | <i>Cen8.t01904</i> | B      | F1-R1 | 479  | 395 | 479, 395      | same      | +, +    | +, +    | +, +    | +, +    | + |
| 219 | <i>Cen8.t01910</i> | A5     | F1-R1 | 273  | 273 | 273           | same      | +       | +       | -       | +       | + |
| 220 | <i>Cen8.t01913</i> | C      | F1-R1 | 597  | 132 | 400, 520, 597 | different | -, -, - | +, -, + | -, +, - | -, -, - | + |
| 221 | <i>Cen8.t01915</i> | A4 (B) | F1-R1 | 1456 | nd  | 1200          |           | +       | +       | +       | +       | + |
| 222 | <i>Cen8.t01926</i> | C      | F1-R1 | 332  | 254 | 332, 254      | same      | +, +    | +, -    | -, +    | -, +    | + |

The RT-PCR result is presented as either presence (+) or absence (-) of target amplification. The cDNAs were derived from 14-d old leaves (L), 14-d old roots (R), 14-d old etiolated leaves/shoots (E) and calli (C).

a, A1-A5, gene models showed alignment with rice transcripts (ESTs or Fl-cDNAs), gene models also had protein homologs were indicated by "B" in the parentheses.

A1: incomplete transcripts that cover only one exon and have no poly(A).

A2: incomplete transcripts that cover only one exon, have no poly(A) and no start or stop codon, A3: incomplete transcripts that have no start and/or stop codon.

A4: incomplete transcripts that contain sequence gap; A5: complete transcripts.

B, gene models have protein homologs; C, gene models predicted by gene finders.

b. no, no predicted product because one of the primers was designed from the intronic region; nd, size of RT-PCR product connecting non-overlapping transcripts can not be pre-determined.

c. na, no amplification or only non-specific amplification.

d. The RT-PCR result is labeled as the "same" as the prediction if product of the predicted size is observed, or with an additional band equal to or smaller than the product amplified from genomic DNA.

Otherwise, it is labeled as "different" from the prediction.
